# Supplementary figures and images for: Epstein‐Barr Virus‐related mucocutaneous ulcer lymphoma associated with Crohn's disease, treated with monoclonal antibody anti‐CD30
Source: PubMed Central journal article supplement — Clin Case Rep. 2020 Apr 8;8(6):958–61. doi: 10.1002/ccr3.2721 (PMC7303872; doi:10.1002/ccr3.2721), 2020-04-08

# Case Medical History

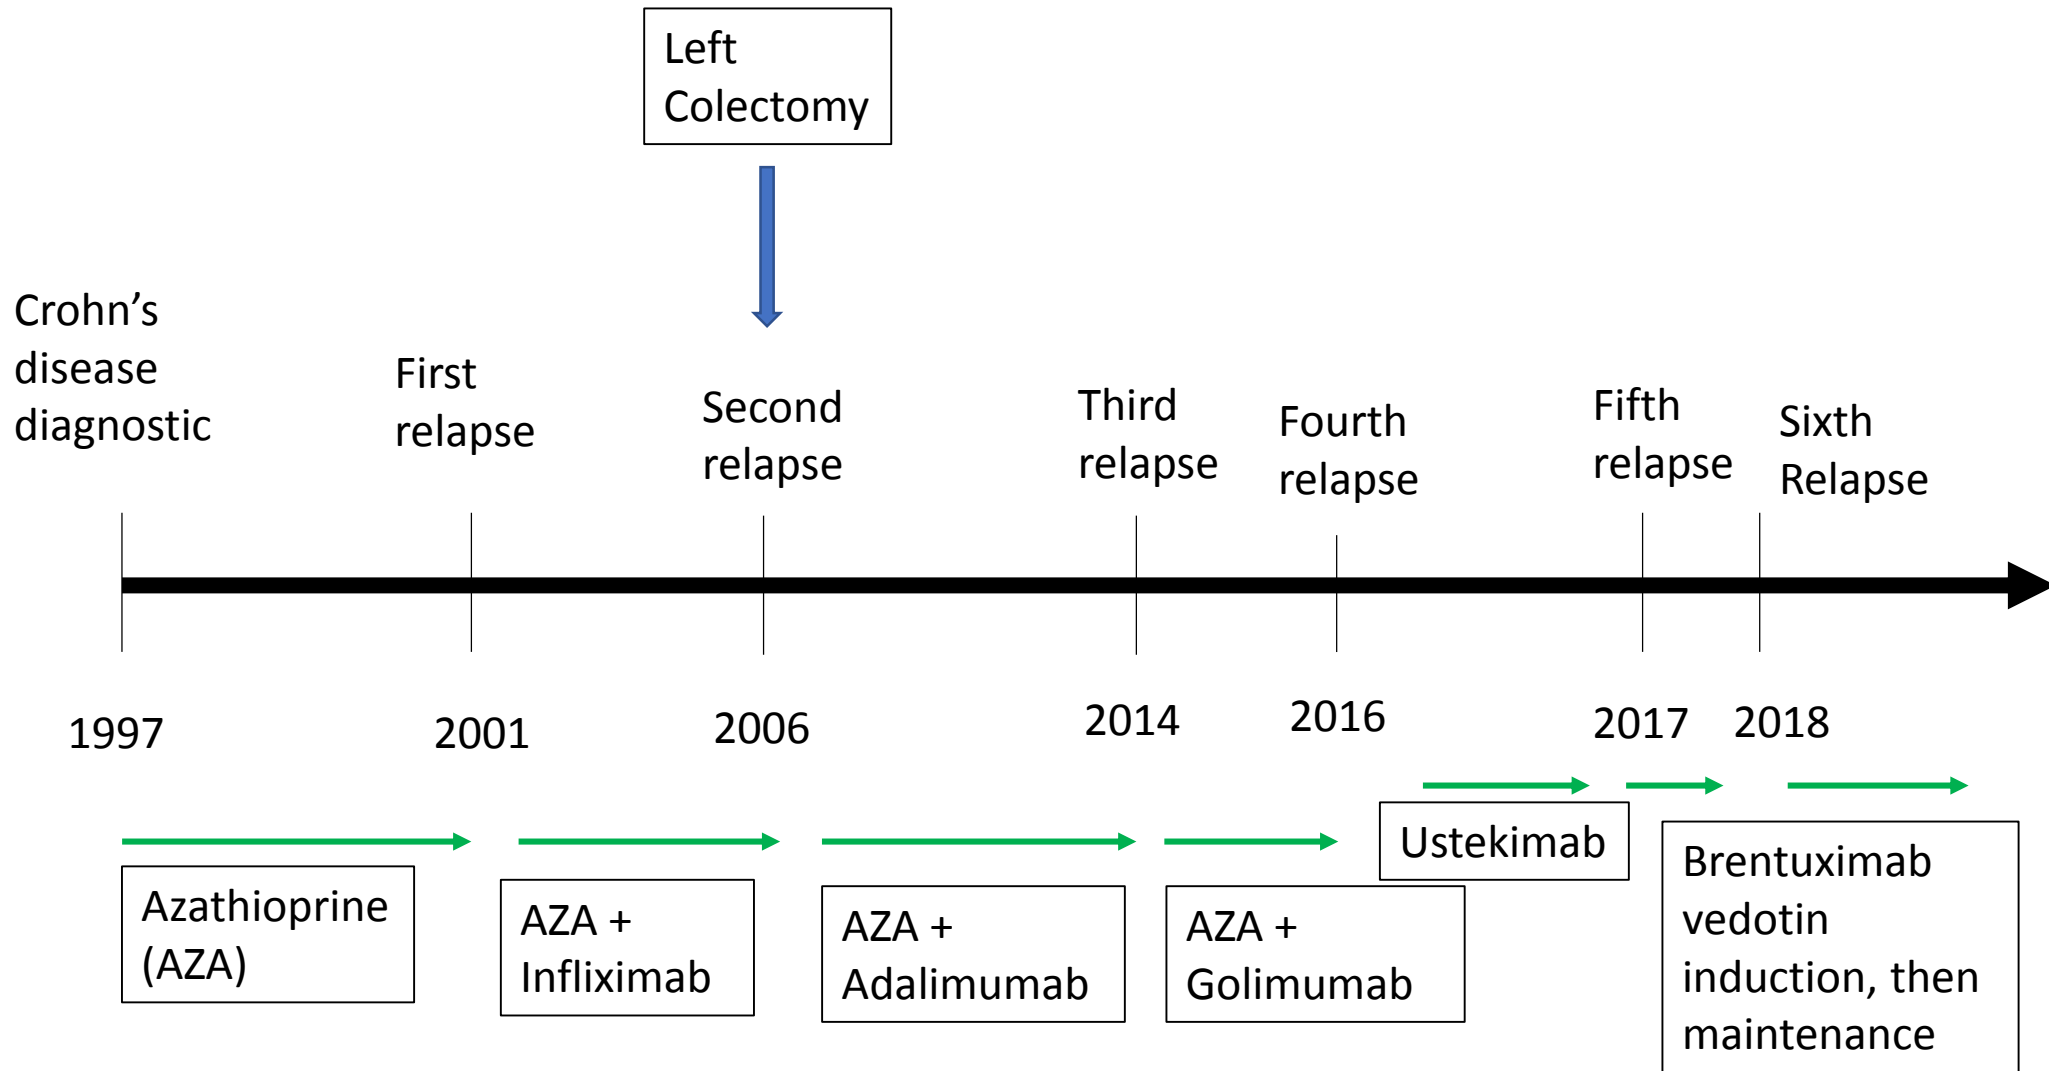

Supplement: CCR3-8-958-s001.pdf [file CCR3-8-958-s001.pdf]
